# Supplementary material for: Time-restricted feeding alleviates metabolic implications of circadian disruption by regulating gut hormone release and brown fat activation
Source: Royal Society of Chemistry journal article supplement (doi:10.1039/d3fo02063k), 2023-01-01
Supplement: d3fo02063k1.pdf [file d3fo02063k1.pdf]

**Fig. S1.** Schematic view and genotyping analysis of *Bmal1* KO mice.

(A) Schematic view of the gRNA locus for *Bmal1* KO mice. (B) Genotyping analysis of *Bmal1* KO mice shows three genotyping: WT(*Bmal1*<sup>wt/wt</sup>), *Bmal1* heterozygote mice (*Bmal1*<sup>wt/-</sup>) and *Bmal1* KO mice (*Bmal1*<sup>-/-</sup>).
