# Supplementary material for: Time-restricted feeding alleviates metabolic implications of circadian disruption by regulating gut hormone release and brown fat activation
Source: Royal Society of Chemistry journal article supplement (doi:10.1039/d3fo02063k), 2023-01-01
Supplement: d3fo02063k3.xlsx [file d3fo02063k3.xlsx]

## Sheet: Fig. 1B
		Movement in chamber		CON								CD
				#1	#2	#3	#4	#5	#6			#1	#2	#3	#4	#5	#6
		Light	ZT1	251	26	316	371	183	166		ZT1	198	237	337	316	264	304
			ZT2	100	269	117	85	307	35		ZT2	69	331	149	139	134	312
			ZT3	166	284	179	240	149	205		ZT3	54	193	91	254	135	136
			ZT4	91	113	198	80	0	96		ZT4	269	21	287	78	182	219
			ZT5	160	252	122	51	66	281		ZT5	0	261	126	252	211	71
			ZT6	143	332	67	240	312	197		ZT6	262	0	205	332	204	17
			ZT7	131	0	116	81	85	226		ZT7	53	126	222	112	215	112
			ZT8	347	92	353	358	301	79		ZT8	272	77	354	154	252	339
			ZT9	253	285	74	141	223	80		ZT9	305	83	126	124	96	312
			ZT10	384	362	240	169	314	408		ZT10	313	345	309	328	324	362
			ZT11	198	124	155	165	182	346		ZT11	106	254	196	241	225	294
			ZT12	152	249	210	161	186	160		ZT12	234	78	268	87	107	193
		Dark	ZT13	549	509	135	508	467	166		ZT13	234	247	200	195	305	390
			ZT14	532	592	358	387	621	496		ZT14	592	332	381	441	477	393
			ZT15	546	743	347	326	546	368		ZT15	389	730	262	676	277	436
			ZT16	380	503	583	331	631	330		ZT16	622	377	567	452	628	632
			ZT17	407	581	582	268	300	534		ZT17	485	313	306	518	359	402
			ZT18	391	505	567	347	533	534		ZT18	496	577	469	530	390	525
			ZT19	420	500	525	384	551	523		ZT19	436	537	338	569	404	603
			ZT20	299	361	493	521	215	458		ZT20	424	515	294	227	405	173
			ZT21	496	493	687	681	683	498		ZT21	518	480	471	539	496	637
			ZT22	390	429	577	369	408	537		ZT22	373	578	429	469	445	497
			ZT23	281	339	410	357	413	503		ZT23	382	503	432	452	420	347
			ZT24	340	437	385	404	498	326		ZT24	373	407	423	343	412	502

## Sheet: Fig. 1C
		Movement in chamber		CON
				#1	#2	#3	#4	#5	#6
			Light	198	199	178.917	178.5	192.333	189.917
			Dark	419.25	499.333	470.75	406.917	488.833	439.417
			Total	617.25	698.333	649.667	585.417	681.167	629.333
				CD
				#1	#2	#3	#4	#5	#6
			Light	177.917	167.167	222.5	201.417	195.75	222.583
			Dark	443.667	466.333	381	450.917	418.167	461.417
			Total	621.583	633.5	603.5	652.333	613.917	684

## Sheet: Fig.1D
		Movement in chamber		CON								CD								CD-tRF
				#1	#2	#3	#4	#5	#6			#1	#2	#3	#4	#5	#6			#1	#2	#3	#4	#5	#6
		Light	ZT1	318	383	233	142	246	356		ZT1	296	394.667	342	234.667	101.333	340		ZT1	261	343	486	200	314	211
			ZT2	300	362	65	140	155	164		ZT2	436.667	296.667	400	330.667	300.333	325.667		ZT2	329	347	215	208	372	173
			ZT3	220	354	337	177	132	67		ZT3	511	347	387	779.333	376	290.667		ZT3	305	203	241	211	368	287
			ZT4	213	287	154	0	223	201		ZT4	479	220	250	334.333	423.667	316.667		ZT4	261	199	271	331	302	301
			ZT5	110	68	244	23	100	291		ZT5	211	327.333	340.667	299	146.667	171		ZT5	260	286	243	320	382	197
			ZT6	162	369	0	160	143	293		ZT6	220	123	219.333	215	389	193.667		ZT6	198	317	190	177	228	219
			ZT7	229	240	67	68	114	125		ZT7	312	438.667	131.667	223.667	543	297.667		ZT7	246	242	384	114	161	285
			ZT8	95	81	65	98	260	366		ZT8	282.333	419.667	275.333	122.333	414.667	501		ZT8	241	261	371	284	364	294
			ZT9	0	212	123	269	196	350		ZT9	355.333	351.333	121	237	497.667	102.667		ZT9	253	285	299	340	327	316
			ZT10	197	253	226	409	145	159		ZT10	335.333	179	385.667	189.667	248.667	315.667		ZT10	171	263	324	97	175	238
			ZT11	103	117	78	201	385	155		ZT11	243.667	188.667	215	179	151.333	337.333		ZT11	242	250	160	191	266	179
			ZT12	162	187	172	270	160	78		ZT12	332.667	144.667	316.667	200.333	107	170.667		ZT12	261	186	240	139	255	208
		Dark	ZT13	446	364	320	118	526	580		ZT13	140.667	194.667	60.6667	48	311	291.333		ZT13	431	433	469	335	382	380
			ZT14	568	388	329	304	591	635		ZT14	130.333	151	247	190.667	321.667	306.333		ZT14	467	355	351	235	311	405
			ZT15	183	323	409	484	598	767		ZT15	116.333	80.3333	113	114.667	249	53		ZT15	467	465	479	308	386	376
			ZT16	288	417	559	636	615	535		ZT16	419	148.333	353	311	653.667	217		ZT16	459	416	401	441	474	393
			ZT17	256	259	313	550	543	633		ZT17	308	224	619.333	389	726.333	213		ZT17	407	548	450	275	415	312
			ZT18	322	367	358	589	577	551		ZT18	342	431.667	472.667	478	370.667	283		ZT18	353	377	478	309	425	541
			ZT19	342	636	592	493	518	279		ZT19	640	405.333	665.667	399.667	321.667	486		ZT19	467	456	372	453	390	500
			ZT20	294	559	429	307	464	151		ZT20	412.333	501.333	319.333	469	576	511.333		ZT20	453	339	538	322	467	366
			ZT21	668	702	470	539	608	614		ZT21	459.667	310.667	592.333	618.667	746.333	406.667		ZT21	449	532	506	259	346	337
			ZT22	527	586	413	473	537	359		ZT22	340	332.667	646.667	684.667	330.333	258		ZT22	407	540	468	335	468	430
			ZT23	247	272	431	338	511	430		ZT23	508.667	468.667	263.333	434.333	407	451		ZT23	478	415	443	243	323	464
			ZT24	501	418	316	319	519	440		ZT24	354.333	597	263.333	446.333	190.333	419		ZT24	431	509	393	398	471	406

## Sheet: Fig.1E
		Movement in chamber		CON
				#1	#2	#3	#4	#5	#6
			Light	175.75	242.75	147	163.083	188.25	217.083
			Dark	386.833	440.917	411.583	429.167	550.583	497.833
			Total	562.583	683.667	558.583	592.25	738.833	714.917
				CD
				#1	#2	#3	#4	#5	#6
			Light	334.583	285.889	282.028	278.75	308.278	280.222
			Dark	347.611	320.472	384.694	382	433.667	324.639
			Total	682.194	606.361	666.722	660.75	741.944	604.861
				CD-tRF
				#1	#2	#3	#4	#5	#6
			Light	252.333	265.167	285.333	217.667	292.833	242.333
			Dark	439.083	448.75	445.667	326.083	404.833	409.167
			Total	691.417	713.917	731	543.75	697.667	651.5

## Sheet: Fig.1F
		Food intake (grams)		CON
				#1	#2	#3	#4	#5	#6
			Light	0.8	0.833333	0.7	0.733333	0.8	0.733333
			Dark	2.16667	2.1	2.43333	2.16667	1.93333	1.83333
			Total	2.96667	2.93333	3.13333	2.9	2.73333	2.56667
				CD
				#1	#2	#3	#4	#5	#6
			Light	1.36667	1.23333	0.966667	1.4	1.45	0.833333
			Dark	1.63333	1.73333	1.83333	1.6	1.73333	1.96667
			Total	3	2.96667	2.8	3	3.18333	2.8
				CD-tRF
				#1	#2	#3	#4	#5	#6
			Light	0.266667	0.4	0.2	0.433333	1	0.866667
			Dark	2.5	2.43333	2.56667	2.43333	1.93333	2
			Total	2.76667	2.83333	2.76667	2.86667	2.93333	2.86667

## Sheet: Fig.1G
		Body weight (grams)
			CON	#1	#2	#3	#4	#5	#6
				28.2	28.7	30.4	28.9	27.8	27.7
			CD	#1	#2	#3	#4	#5	#6
				29.3	28.9	28.5	28.9	31.4	28.3
			CD-tRF	#1	#2	#3	#4	#5	#6
				28.3	27.6	27.9	28.6	29	29.3

## Sheet: Fig.1H
		HOMA-IR		ZT2
			CON	#1	#2	#3	#4	#5	#6
				2.83295	5.28273	3.8003	4.91735	3.67467	3.55113
			CD	#1	#2	#3	#4	#5	#6
				8.2434	7.13733	4.71111	4.11123	6.91225	7.50742
			CD-tRF	#1	#2	#3	#4	#5	#6
				4.49335	3.37001	3.84427	4.86815	3.79716	5.60622
				ZT14
			CON	#1	#2	#3	#4	#5	#6
				5.33926	5.11888	4.97493	4.7912	4.69541	3.45063
			CD	#1	#2	#3	#4	#5	#6
				8.04448	4.52581	4.76974	6.14957	7.911	7.59955
			CD-tRF	#1	#2	#3	#4	#5	#6
				5.27121	3.94686	4.27141	5.36072	4.69436	5.10894

## Sheet: Fig.2B
		OGTT
		Glucose (mg/dL)
			ZT2							ZT14
		CON							CON
			0	15M	30M	60M	120M			0	15M	30M	60M	120M
		#1	124	294	316	260	121		#1	112	227	257	199	143
		#2	108	287	326	267	156		#2	108	246	270	223	156
		#3	121	262	265	206	164		#3	121	262	265	206	154
		#4	119	279	273	247	159		#4	119	229	273	247	132
		#5	140	293	318	255	136		#5	140	281	308	211	136
		#6	119	242	333	255	172		#6	119	242	268	219	162
			ZT2							ZT14
		CD							CD
			0	15M	30M	60M	120M			0	15M	30M	60M	120M
		#1	141	296	267	255	169		#1	109	244	283	207	166
		#2	108	246	326	267	156		#2	108	246	326	267	156
		#3	121	262	265	206	154		#3	121	262	265	206	154
		#4	119	270	273	247	132		#4	119	229	273	247	132
		#5	140	293	318	211	136		#5	140	293	318	211	136
		#6	119	242	289	255	162		#6	119	242	268	255	162
			ZT2							ZT14
		CD-tRF							CD-tRF
			0	15M	30M	60M	120M			0	15M	30M	60M	120M
		#1	129	277	333	248	154		#1	124	226	262	227	119
		#2	108	266	326	267	156		#2	108	246	276	211	156
		#3	121	262	265	206	154		#3	121	262	265	206	154
		#4	119	263	289	247	132		#4	119	229	273	247	132
		#5	140	293	318	211	136		#5	140	221	259	211	136
		#6	119	242	268	255	162		#6	119	242	268	198	130
		AUC
			ZT2							ZT14
			CON		CD		CD-tRF			CON		CD		CD-tRF
		#1	27780		28050		28395			23273		25140		24000
		#2	29145		28530		28830			25290		28530		24885
		#3	24990		24690		24690			24690		24690		24690
		#4	27105		26160		26415			25545		25545		25545
		#5	28155		26175		26175			25770		26175		23768
		#6	28650		27360		26888			25268		26888		23363

## Sheet: Fig.2C
		ITT
		Glucose (mg/dL)
			ZT2							ZT14
		CON							CON
			0	15M	30M	60M	120M			0	15M	30M	60M	120M
		#1	127	59	53	73	89		#1	134	92	50	49	74
		#2	116	87	73	79	96		#2	130	97	58	38	66
		#3	122	76	81	85	99		#3	134	59	53	38	73
		#4	133	65	58	69	81		#4	120	73	78	81	85
		#5	120	76	74	83	75		#5	119	93	72	64	74
		#6	131	72	73	77	87		#6	131	72	73	65	69
			ZT2							ZT14
		CD							CD
			0	15M	30M	60M	120M			0	15M	30M	60M	120M
		#1	137	89	90	105	102		#1	120	83	83	93	92
		#2	128	84	75	74	114		#2	135	85	84	89	87
		#3	126	90	81	71	105		#3	133	98	97	83	94
		#4	117	81	99	89	95		#4	132	91	100	99	116
		#5	126	96	95	74	92		#5	136	100	74	97	95
		#6	137	93	85	84	112		#6	135	95	85	82	109
			ZT2							ZT14
		CD-tRF							CD-tRF
			0	15M	30M	60M	120M			0	15M	30M	60M	120M
		#1	126	70	66	77	98		#1	122	95	74	53	96
		#2	136	80	69	51	70		#2	128	73	65	55	85
		#3	132	72	76	69	81		#3	120	82	66	57	70
		#4	118	88	74	75	97		#4	136	75	70	61	92
		#5	134	89	80	69	88		#5	136	76	78	67	92
		#6	121	68	61	84	95		#6	121	59	73	59	69
		AUC
			ZT2							ZT14
			CON		CD		CD-tRF			CON		CD		CD-tRF
		#1	8985		12173		9885		#1	7935		10958		9270
		#2	10253		10658		8168		#2	7425		10793		8543
		#3	10673		10463		9315		#3	6983		11205		8280
		#4	8813		11175		10155		#4	9945		12540		9225
		#5	9690		10613		9885		#5	9008		11400		9690
		#6	9780		11475		9930		#6	8700		11310		8160

## Sheet: Fig.2D
		GLP-1（pg/mL）
			ZT2			ZT14
		CON
			0	15M		0	15M
		#1	8.756	11.744		13.083	22.646
		#2	11.584	22.518		12.204	18.032
		#3	11.163	17.565		9.817	26.309
		#4	9.519	18.391		11.783	29.155
		#5	10.124	15.432		11.958	36.038
		#6	10.875	17.376		16.943	33.07
			ZT2			ZT14
		CD
			0	15M		0	15M
		#1	14.783	11.724		7.533	17.552
		#2	14.288	16.954		7.58	15.142
		#3	9.309	19.569		11.237	23.182
		#4	11.432	17.376		10.616	18.187
		#5	9.978	19.5		9.3	21.584
		#6	9.347	13.11		11.13	16.301
			ZT2			ZT14
		CD-tRF
			0	15M		0	15M
		#1	11.793	19.463		14.983	20.509
		#2	7.927	15.661		17.291	20.485
		#3	10.412	14.897		10.056	17.63
		#4	11.473	12.951		11.955	19.238
		#5	10.674	14.271		16.047	22.957
		#6	9.566	19.774		9.754	27.144

[truncated: 21 more sheets: Fig.2E, Fig.3B , Fig.3C, Fig.3D, Fig.3E, Fig.4B, Fig. 5B, Fig.5D, Fig.5E, Fig.6B, Fig.6C, Fig.7C, Fig.7D, Fig.7E, Fig.7F, Fig.7G, Fig.7H, Fig.8C, Fig.8D, Fig.8E …]
