# Supplementary figures and images for: Time-restricted feeding alleviates metabolic implications of circadian disruption by regulating gut hormone release and brown fat activation
Source: Royal Society of Chemistry journal article supplement (doi:10.1039/d3fo02063k), 2023-01-01

Fig. S1

A

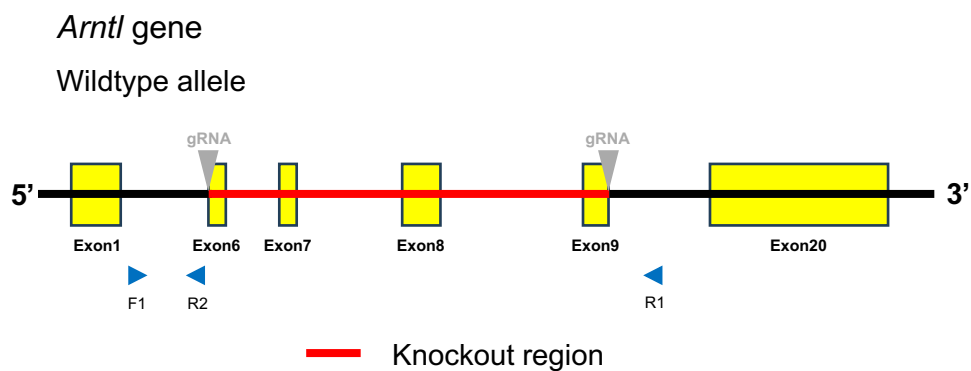

B

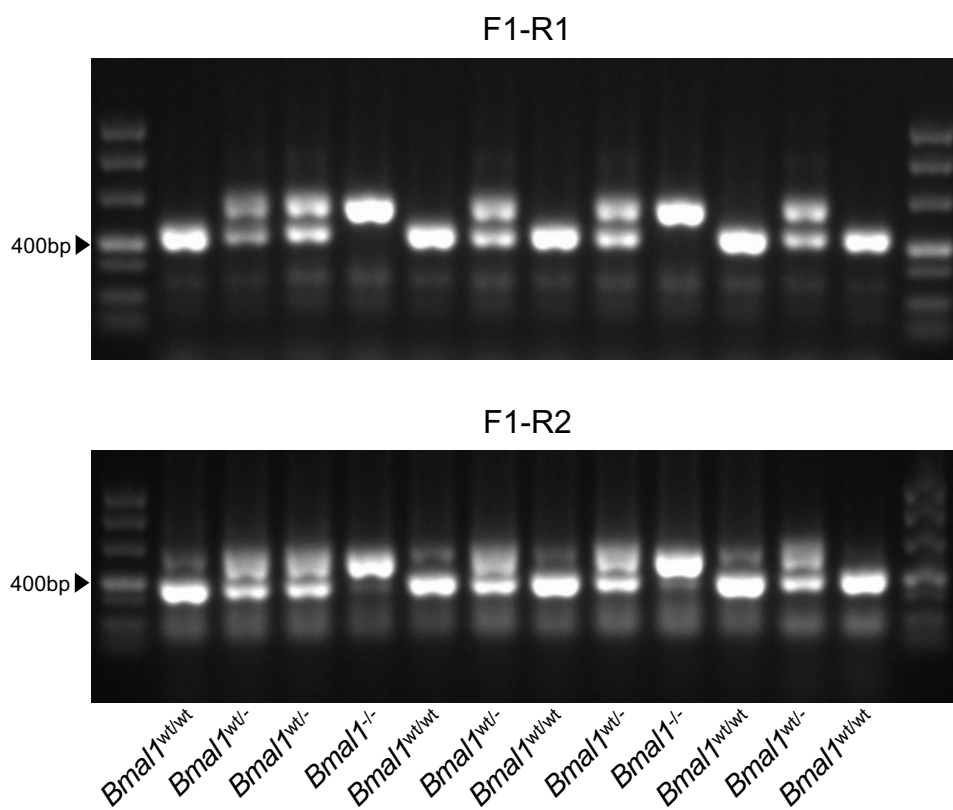

Supplement: d3fo02063k2.pdf [file d3fo02063k2.pdf]
